# Supplementary material for: Efficacy and safety of sodium-glucose cotransporter 2 (SGLT2) inhibitors in patients with acute heart failure: a systematic review and meta-analysis
Source: Front Cardiovasc Med. 2024 Sep 11;11:1388337. doi: 10.3389/fcvm.2024.1388337 (PMC11422105; doi:10.3389/fcvm.2024.1388337)
Supplement: Supplementary file 1 [file Table1.xlsx]

## Sheet: Sheet1
Supplementary table 1. Trial characteristics of the included studies.
	EMPA-RESPONSE-AHF 2020 (7)	DICTATE-AHF 2024 (8)	SOLOIST-WHF 2021 (10)	Masaki Nakagaito 2021 (11)	EMPAG-HF 2022 (12)	EMPULSE trial 2022 (13)	CHaraya 2022 (14)	IbrahimA 2020 (15)	Tamaki 2021 (16)	Kirsten Thiele 2022 (17)	López-VilellaR 2022 (18)	Pérez-Belmonte L.M. 2021 (19)	Sebastian Carballo 2020 (20)
SGLT2 inhibitor group (N)	40	119	608	56	30	265	50	50	30	9	83	99	220
Placebo group (N)	39	119	614	30	29	265	52	50	29	10	453	109	595
Participants (N)	79	238	1222	86	59	530	102	100	59	19	536	208	815
Male/female	53/26	145/93	810/412	55/31	36/23	351/179	56/46	54/46	36/23	45545	309/227	104/104	471/344
Country, center	five centres in the Netherlands	multi-center in America	306 sites in 32 countries	Single Center in Japan	Single Center in Germany	118 centers in 15 countries	Single Center in Russia	multi-center in Egypt	Single Center in Japan	Single Center in Germany	Single Center in Spain	multi-center in Spain	Single Center in Switzerland
Follow-up time	60days	1 months	Median of 9.2 months	12 months	30days	90days	30days	Until discharge	7days	30days	35 months	69 months	12 months
Age, years (SGLT2)	78.3±7.7	64.6±12.8	69.4±9.7	69.6 ± 11.5	72.9±11.2	70.3±11.9	72.6±12.2	62.0 ± 8.8	80.0±4.7	71.8 ± 13.4	72.4±12.6	84.5± 4.0	74.4±12.8
Age, years (control)	72.3 ± 16.9	64.4±14.3	70.0±8.9	75.8 ± 13.0	76.5±8.3	68.9±14.2	74.2 ± 11.3	60.6 ± 9.9	80.2±7.0	72.3 ± 9.9	73.4±12.6	86.4 ± 4.8	79.3±10.5
Clinical registration number	NCT03200860	NCT04298229	NCT03521934	NA	NCT04049045	NCT04157751	NA	NCT04385589	NA	NA	NA	NA	NCT02444416
Type of study	RCT	RCT	RCT	prospective	RCT	RCT	RCT	RCT	RCT	RCT	retrospective	retrospective	prospective
Intervention Group	empagliflozin	dapagliflozin and standard therapy	Sotagliflozin	SGLT2 was used from admission to discharge	empagliflozin	empagliflozin	dapagliflozin and standard therapy	dapagliflozin and standard therapy	empagliflozin	empagliflozin	SGLT2i	empagliflozin combined with basal insulin regimen	Dapagliflozin
Control Group	placebo	standard therapy	placebo	SGLT2 was used at admission and not at discharge	placebo	placebo	standard therapy	standard therapy	standard therapy	placebo	standard therapy	conventional basal-bolus insulin regimen	standard therapy
Frequency and dose of intervention	10mg per day	10 mg per day	200-400 mg per day（depending on side effects）	NA	25mg per day	10mg per day	10 mg per day	10 mg per day	10 mg per day	10mg per day	NA	NA	NA
Time to start medication	24 h of presentation to the hospital	24 h of presentation to the hospital	48.8% in hospital, 51.2% within a median of 2 days after discharge	after admission and randomization	12 h of presentation to the hospital	clinically stable (median time from hospital admission to randomization, 3 days)	the first 24 hours of hospitalisation	after admission and randomization	after admission and randomization	admission and randomization was 72 h	after admission and randomization	NA	NA
Type of patients	Patients with Acute (decompensated) HFregardless of diabetes status	Patients with acute heart failure regardless of diabetes status	patients with type 2 diabetes mellitus who were recently hospitalized for worsening heart failure	patients with T2 DM and ADHF	Patients with acute decompensated heart failurere gardless of diabetes status	Patients with acute heart failure regardless of diabetes status	18 years of age admitted to the hospital with acute heart failure	type 2 diabetic patients with decompensated heart failure	type 2 diabetic patients with decompensated heart failure	acute decompensated HF with or without diabetes	hospitalized for decompensated HF	very old patients with type 2 diabetes hospitalized for acute heart failure	onsecutive patients admitted with ADHF
Sglt2i/control SBP（mmHg）	127 ± 22/ 121 ± 25	123±18/122±20	123±18/122±16	109 ± 17/110 ± 17	139±25/ 132±21	121±19/ 123±21	133±18/130±21	111±13/113 ± 15	120±18/115±16	139 ±23/ 126 ± 24	NA	125±13 /130±14	136±22/142±26
Sglt2i/control DBP（mmHg）	76 ± 15/ 72 ± 15	76±16/76 ±17	73±10/ 73 ±10	NA	NA	73±13/ 74.0 ±10	79±9/79±11	73 ± 8/74 ± 9	67±15/ 65±11	80 ± 24/ 67 ± 13	NA	67± 7/ 71 ± 8	86±16/ 78±18
Frequency of intervention	Every day for 30 days	Every day for 5 days in hospital or discharge	Every day for 8 months	NA	Every day for 5 days	Every day for 90 days	Every day for 30 days	Every day of hospitalization	Every day for 7 days	Every day for 30 days	NA	NA	NA
NTproBNP baseline levels	4406 (2873–6979)/6168 (3180–10 489)	2277 (1007–6670)/2927 (1167–5477)	1817 (855–3659)/ 1741 (843–3582)	NA	4726 (2939–6513)/ 4823(2923–6724)	3299 (1843–6130)/3106 (1588–6013)	5333 (2029-9902)/ 4381 (2313- 11514)	NA	2750 (1660–4710)/3950 (2200–8870)	3562 ± 2527/3996 ± 6293	5746±4554，5755±4826	3268 ± 877/3563 ± 998	7359±5840/ 5127± 7990
LVEF	36 ± 17/ 37 ± 14	42±22/40±26	37±14/36±13	43 ± 18/ 39 ± 14	45±16/ 44±14	33±16/ 34±20	46±16/44±14	74 ± 9/32 ± 2	46±23/41±15	34±11/38 ± 11	NA	NA	NA
eGFR mL/min/1.73 m2	55 ± 18/ 55 ± 18	54±19/55±23	50±16/52±18	54 ± 24/53 ± 21	58±19/62±18	50±22/54±23	56±18/ 53±17	NA	NA	63 ± 22/56 ± 16	62±21/58±24	59 ± 22 /55 ± 20	57±21/49±26
Diabetes(%)	38/28	71/71	97.2/97.7	NA	43/35	46.8/43.8	30/30	100/100	100/100	11/40	65/30.9	100/100	31.4/34.1
Hypertension(%)	68/56	90/81	NA	NA	90/86	77.4/83.4	92/92	56/62	97/93	NA	79.5/79.9	79.8/74.3	70/82.5
Primary endpoint	change in dyspnoea VAS from baseline to day 4, diuretic response ，length of initial hospital stay, percentage change in NT-proBNP from baseline to day 4.	Diuretic efficiency	Total number of deaths from cardiovascular causes and hospitalizations and urgent visits for heart failure	unplanned HF hospitalization	The primary end point was cumulative urine output over 5 days.	Clinical benefit is defined as a hierarchical composite of all-cause mortality, number of heart failure events, and time to a first heart failure event, or a 5-point or more difference in baseline score of KCCQ-TSS	the deterioration of renal function or more within 48 hours (Kidney Disease: Improving Global Outcomes (KDIGO) criteria)	Diuresis Parameters	the extent of deconges-tion as assessed based on NT-proBNP levels	haemodynamic parameters	Cardiovascular death,readmission, and HF emergency department	differences in clinical efficacy measured by the visual analogue scale dyspnea score, NT-proBNP levels, diuretic response, and cumulative urine output	all-cause mortality and readmission, heart failure–related mortality and readmission
Secondary end points	Secondary endpoints of the study included worsening HF (defined as worsening signs and/or symptoms of HF that require an intensification of intravenous therapy for HF or mechanical ventilatory, renal or circulatory support), all-cause death and/or HF readmission through day 30 and through day 60 as part of AE assessment	Secondary outcomes included inpatient worsening heart failure (HF) and 30-day hospital readmission for HF or diabetes-related issues. Safety outcomes included change in eGFR from baseline and the following events: prolonged hospitalization for hypotension or hypoglycemia, ketoacidosis, and inpatient mortality. Exploratory endpoints included changes in natriuretic peptides, serum potassium, measur…	Number of hospitalizations and urgent visits for HF, cardiovascular death, all-cause mortality, and change in KCCQ-TSS score	Cardiovascular death	Secondary end points included diuretic efficiency, dynamics in markers of kidney function and injury, and NT-proBNP (N-terminal pro-B-type natriuretic peptide).	Cardiovascular death or HFE, KCCQ-TSS improvement of 10 or more points, reduction in NT-proBNP concentration, hospitalization for HF, and diuretic response	the development of resistance to diuretics；weight loss during hospitalisation;death from any cause during hospitalisation;rehospitalisation or death for any reason within 30 days following discharge	Changes in Body Weight Measurements ，Dose of Insulin，Renal Function ，Electrolyte Levels，Patient-Reported Dyspnea，	incidence of hemoconcentration,PV contraction, incidence of WRF , and plasma norepinephrine and serum uric acid levels,the change in body weight from baseline, systolic blood pressure, heart rate, urine volume, urinary excretion of glucose, urinary excretion of sodium, and total furosemide-equivalent dose of loop diuretics.	Secondary endpoints included additional haemodynamic parameters and vital signs as well as several laboratory and urinary values including the AKI Risk Score by NephroCheck庐.	NA	adverse events, worsening heart failure, discontinuation of empagliflozin, length of hospital stay, and in-hospital deaths were also analyzed	NA
