# Supplementary material for: Efficacy and safety of sodium-glucose cotransporter 2 (SGLT2) inhibitors in patients with acute heart failure: a systematic review and meta-analysis
Source: Front Cardiovasc Med. 2024 Sep 11;11:1388337. doi: 10.3389/fcvm.2024.1388337 (PMC11422105; doi:10.3389/fcvm.2024.1388337)
Supplement: Supplementary file 2 [file Table2.xlsx]

## Sheet: Sheet1
	Supplementary Table 2. Quality Assessment Results for Included Observational Studies
	COHORT STUDIES
		Selection				Comparability		Outcome
	study	Representativeness of the exposed cohort	Selection of the non-exposed cohort	Ascertainment of exposure	Demonstration that outcome of interest was not present at start of study	Comparability main	Comparability additional factors	Assessment of outcome	Was follow-ur long enough for outcomes to occur	Adequacy of follow up of cohorts
	López-Vilella R 2022	*	*	*	*	*	-	*	*	*
	Pérez-Belmon te L.M2021	*	*	*	*	*	-	*	*	*
	Masaki Nakagaite 2021	*	*	*	*	*	-	*	*	*
	Sebastian Carballo 2020	*	*	*	*	*	-	*	*	-
